# Supplementary material for: Retrieving Water Turbidity in Araucanian Lakes (South-Central Chile) Based on Multispectral Landsat Imagery
Source: MDPI journal article supplement (doi:10.3390/rs13163133), 2021-08-07
Supplement: s1 [file s1]

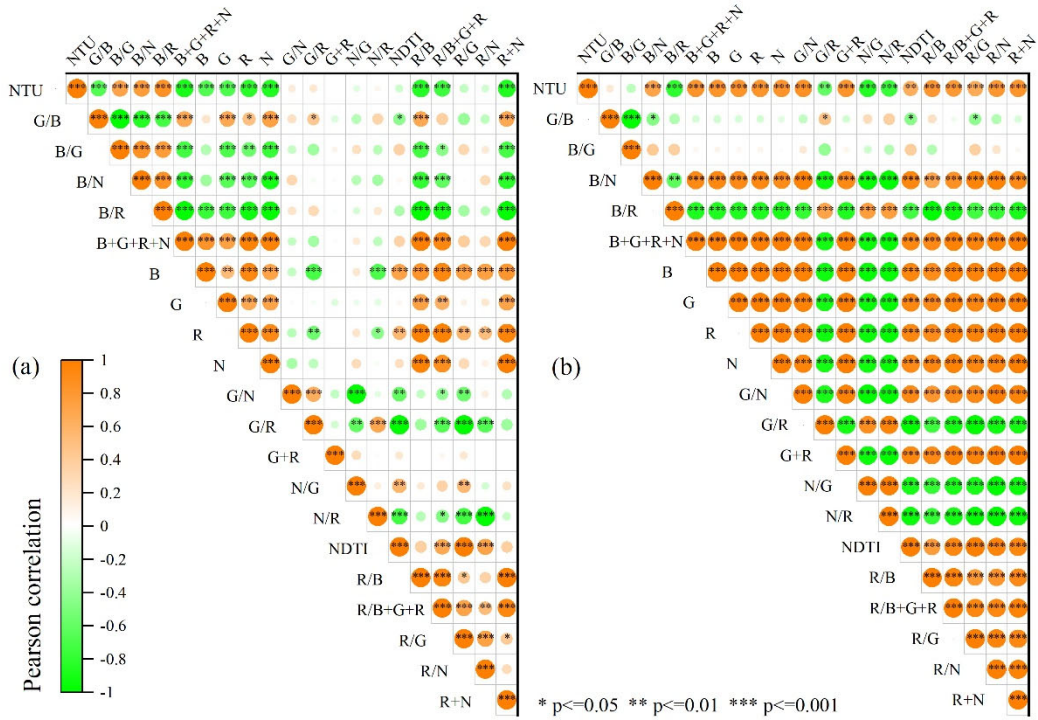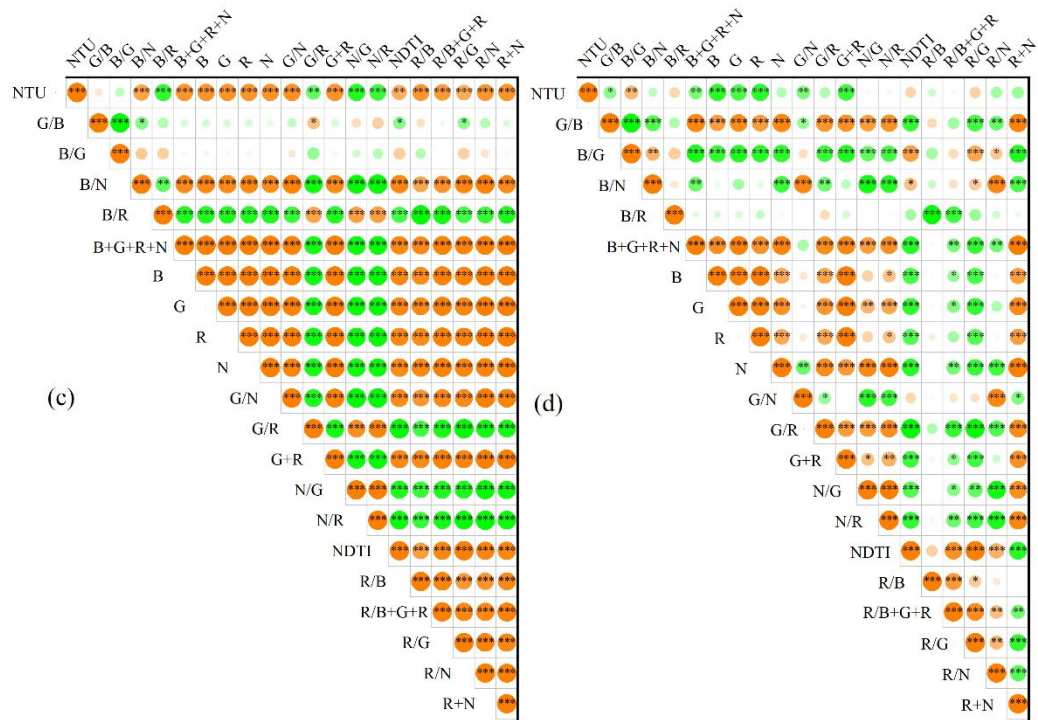

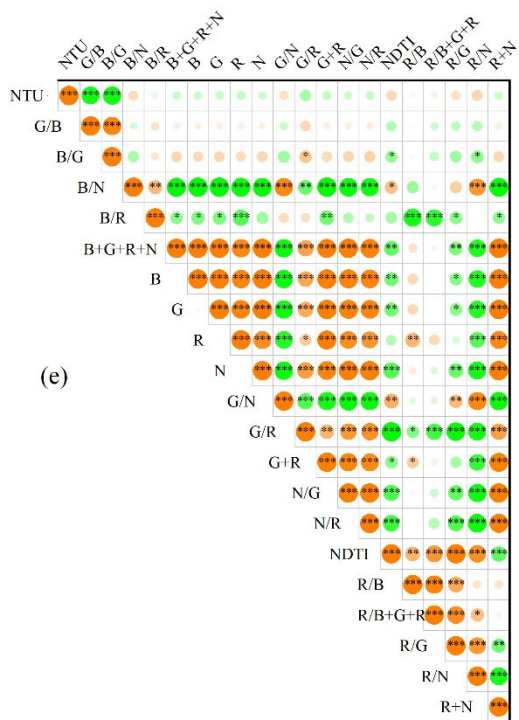

**Figure S1.** Relationships between our field measured turbidity (NTU) and band and band ratios from Landsat-8 OLI in (a) Calafquen, (b) Neltume, (c) Panguipulli, (d) Riñihue and (e) Puyehue lake.

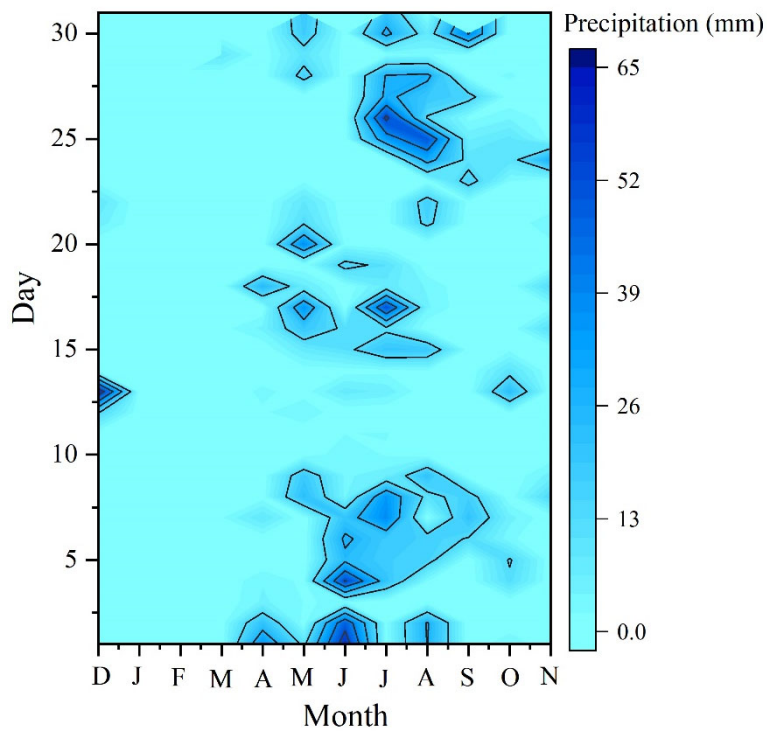

**Figure S2.** Contour plot for daily values of average precipitation during the 2015 year for (a) Santa Carla and (b) Rupanco station. Source: INIA.

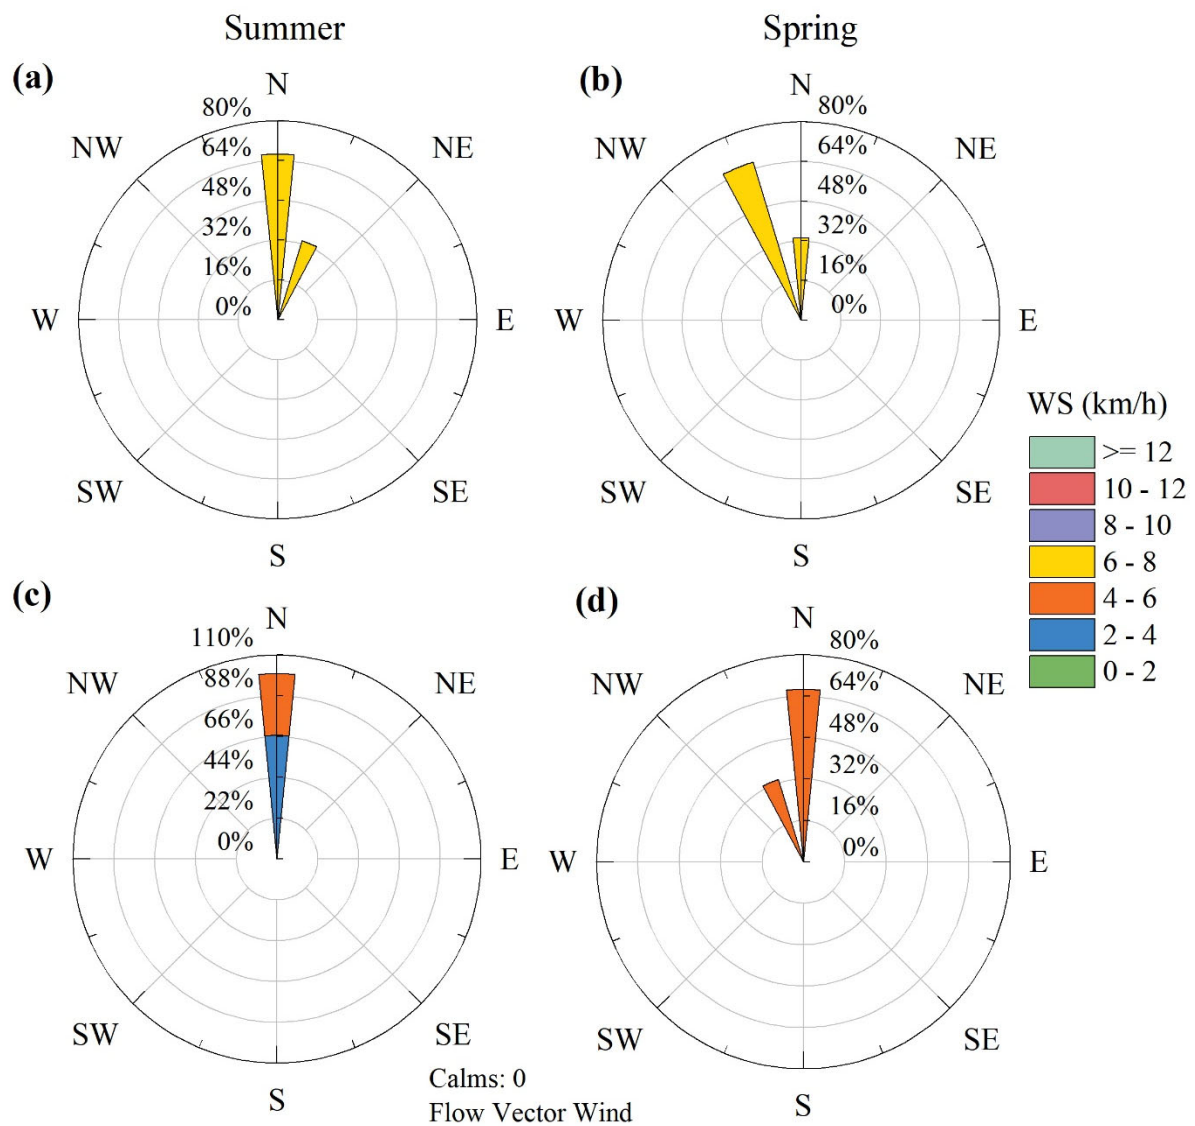

**Figure S3.** Wind roses in summer and spring months during the 2015 year for (a-b) Santa Carla and (c-d) Rupanco station. Source: INIA.
